# Supplementary material for: Construction of 3D pomegranate-like Na3V2(PO4)3/conducting carbon composites for high-power sodium-ion batteries
Source: Royal Society of Chemistry journal article supplement (doi:10.1039/c7ta00153c), 2017-01-01
Supplement: c7ta00153c1.pdf [file c7ta00153c1.pdf]

## Supplementary Information

# Construction of 3D Pomegranate-Like $\text{Na}_3\text{V}_2(\text{PO}_4)_3$ /conducting carbon composites for high power sodium ion batteries

*Enhui Wang,<sup>ab</sup> Wei Xiang,<sup>d</sup> Ranjusha Rajagopalan,<sup>ab</sup> Zhenguo Wu,<sup>a</sup> Junghoon Yang<sup>c</sup>,*

*Mingzhe Chen,<sup>ab</sup> Benhe Zhong<sup>a</sup>, Shi Xue Dou<sup>b</sup>, Shulei Chou,<sup>\*b</sup> Xiaodong Guo,<sup>\*ab</sup> and*

*Yong-Mook Kang<sup>\*c</sup>*

<sup>a</sup> College of Chemical Engineering, Sichuan University, Chengdu 610065, PR China

<sup>b</sup> Institute for Superconducting and Electronic Materials, Australian Institute for Innovative Materials, University of Wollongong, Innovation Campus, Squires Way, North Wollongong, NSW 2522, Australia

<sup>c</sup> Department of Energy and Materials Engineering, Dongguk University-Seoul, Seoul 04620, Republic of Korea

<sup>d</sup> College of Materials and Chemistry & Chemical Engineering, Chengdu University of Technology, Chengdu 610059, PR China

\* Corresponding author E-mail:

Xiaodong Guo; [xiaodong2009@scu.edu.cn](mailto:xiaodong2009@scu.edu.cn), Shulei Chou; [shulei@uow.edu.au](mailto:shulei@uow.edu.au), Yong-

Mook Kang; [dake1234@dongguk.edu](mailto:dake1234@dongguk.edu)

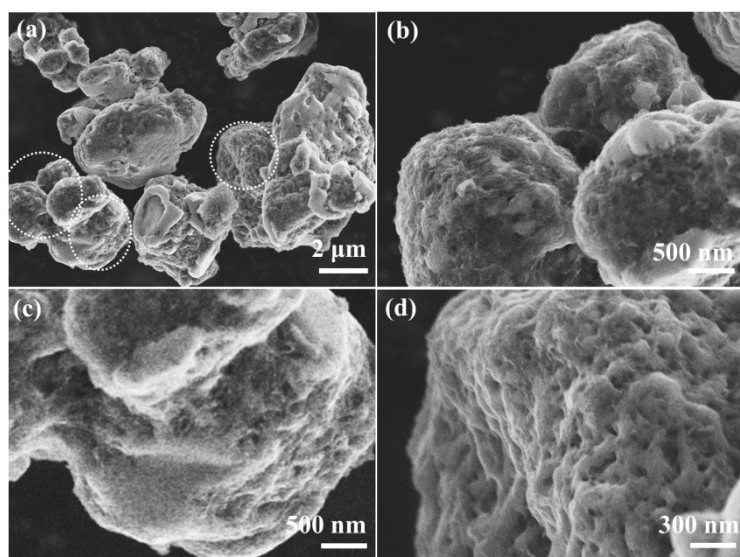

Fig. S1 SEM pictures of PL-NVP@C in (a) low magnification, and (b)(c)(d) partial enlarged images.

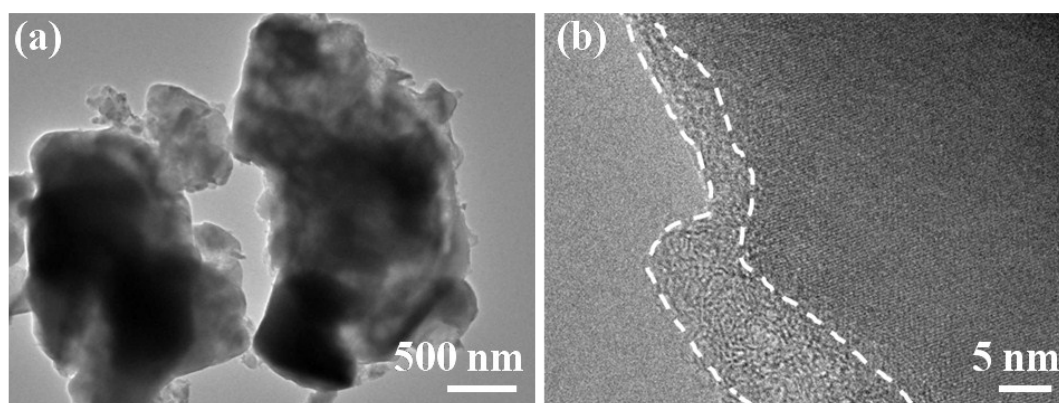

Fig. S2 TEM/HRTEM images of NVP@C.

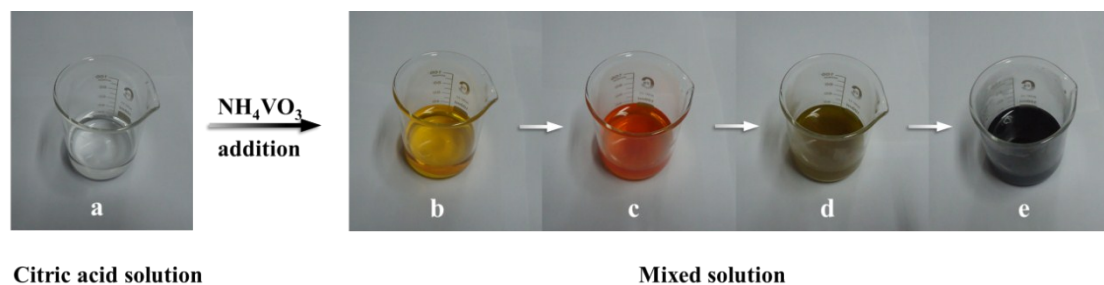

Fig. S3 The color of solution (a) before chelating process and (b)(c)(d)(e) after chelating process; (a) colorless, (b) yellow, (c) orange red, (d) green green, (e) dark blue.

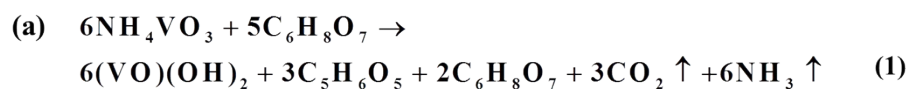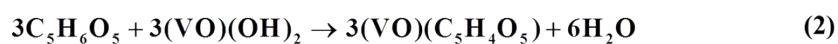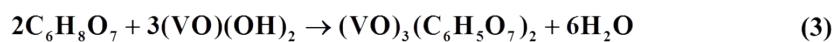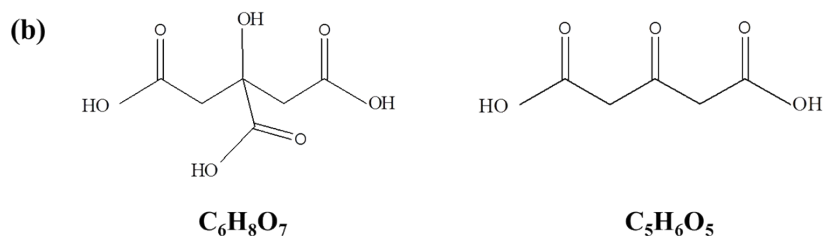

The chemical structures of  $\text{C}_6\text{H}_8\text{O}_7$  and  $\text{C}_5\text{H}_6\text{O}_5$ .

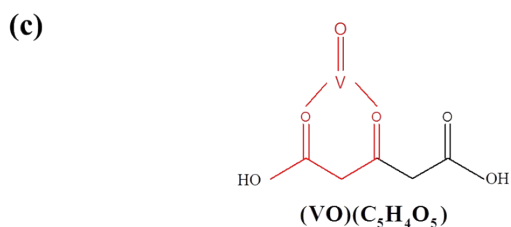

Possible chelating configuration between  $\text{C}_5\text{H}_6\text{O}_5$  chelator and  $(\text{VO})^{2+}$ .

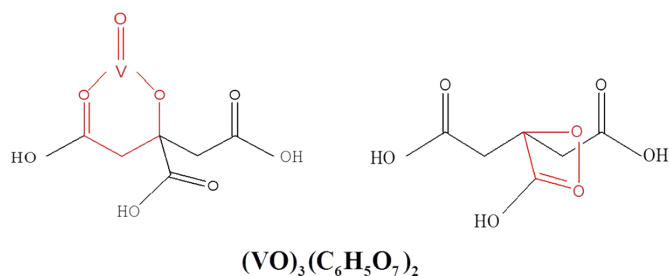

Possible chelating configuration between  $\text{C}_6\text{H}_8\text{O}_7$  chelator and  $(\text{VO})^{2+}$ .

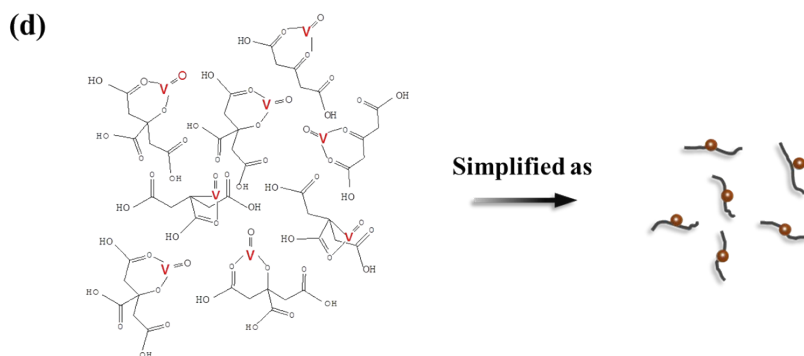

Fig. S4 (a) The corresponding reactions; (b) The chemical structures of  $C_6H_8O_7$  and  $C_5H_6O_5$ ; (c) Possible chelating configurations  $C_6H_8O_7/C_5H_6O_5$  chelators and  $VO^{2+}$ ; (d) The simplified chelating pattern between  $C_6H_8O_7/C_5H_6O_5$  chelators and  $VO^{2+}$  when mixed together, shown in Scheme 1.

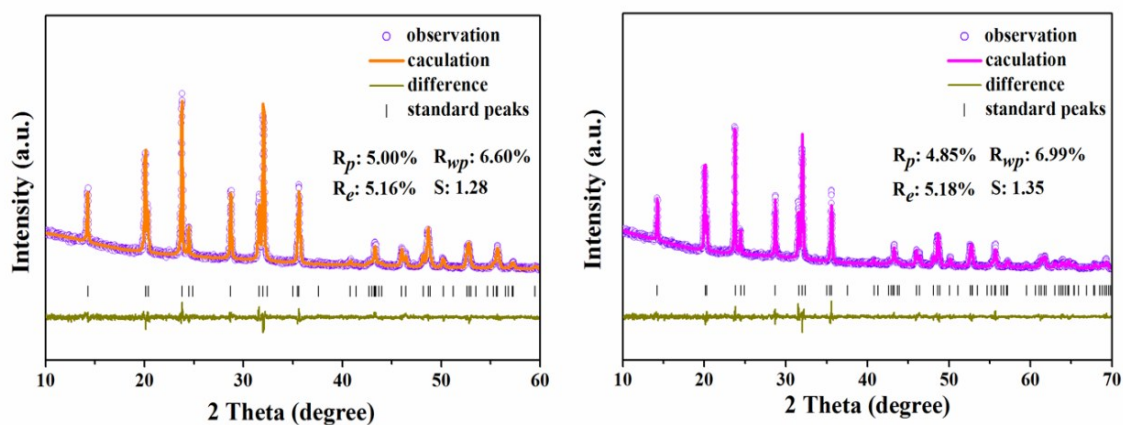

Fig. S5 Rietveld-refined XRD patterns of PL-NVP@C and NVP@C.

Table S1 Unit cell parameters of PL-NVP@C and NVP@C

| Samples  | a(Å)   | c(Å)    | V(Å <sup>3</sup> ) |
|----------|--------|---------|--------------------|
| PL-NVP@C | 8.7259 | 21.8218 | 1438.9469          |
| NVP@C    | 8.7313 | 21.8393 | 1441.8956          |

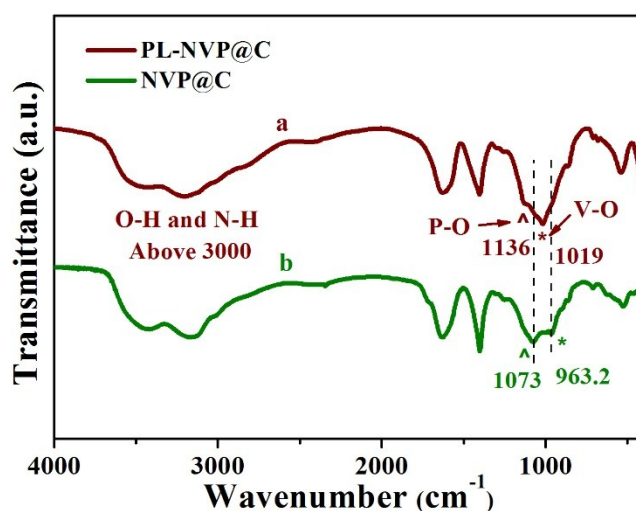

Fig. S6 FTIR spectra of (a) PL-NVP@C and (b) NVP@C.

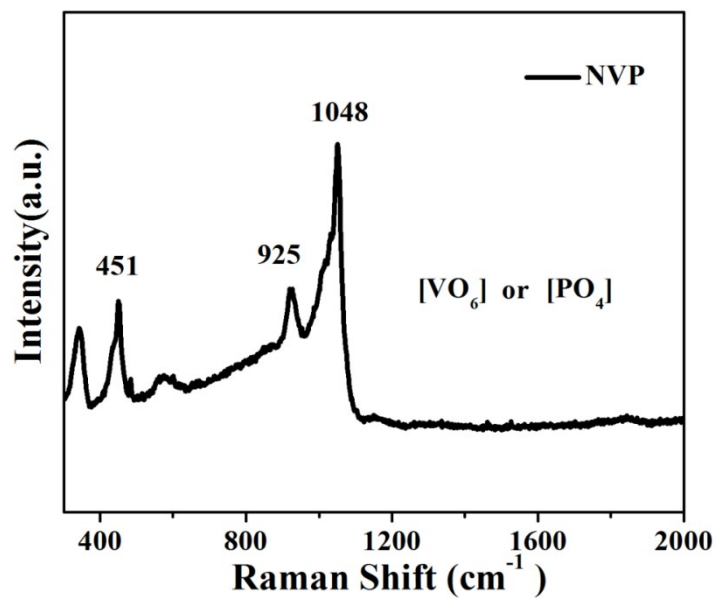

Fig. S7 Raman spectra of NVP.

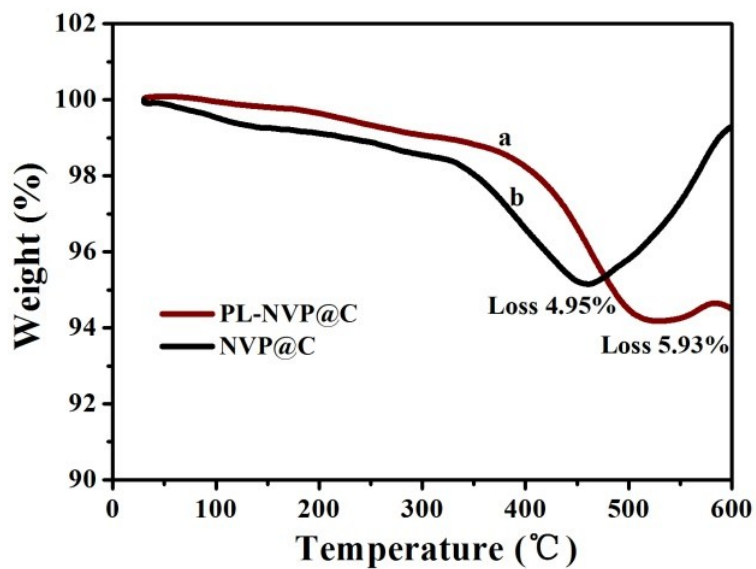

Fig. S8 Thermogravimetric curves of (a) PL-NVP@C and (b) NVP@C in the air.

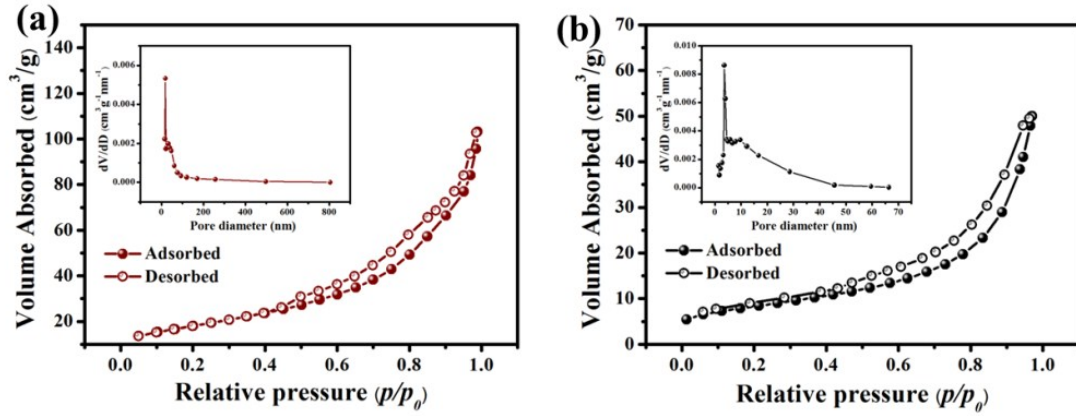

Fig. S9 Nitrogen adsorption/desorption isotherms of (a) PL-NVP@C and (b) NVP@C;

Inset: the BJH pore distribution.

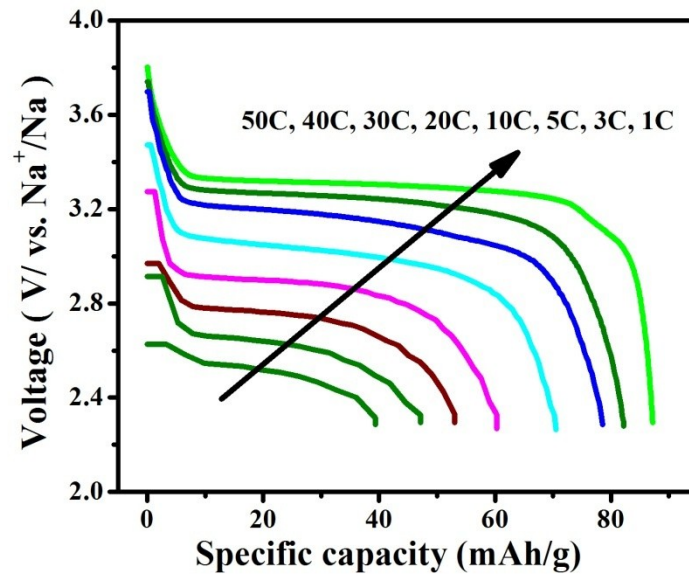

Fig. S10 Discharge curves of NVP@C electrode.



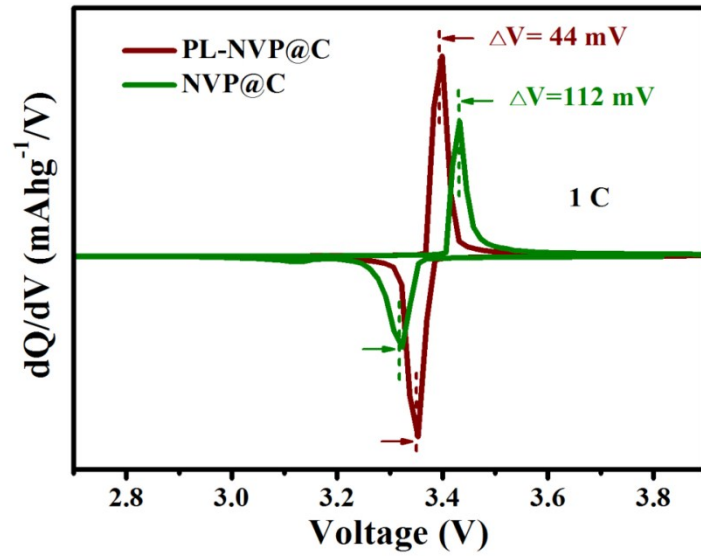

Fig. S11 dQ/dV curves of PL-NVP@C and NVP@C samples.

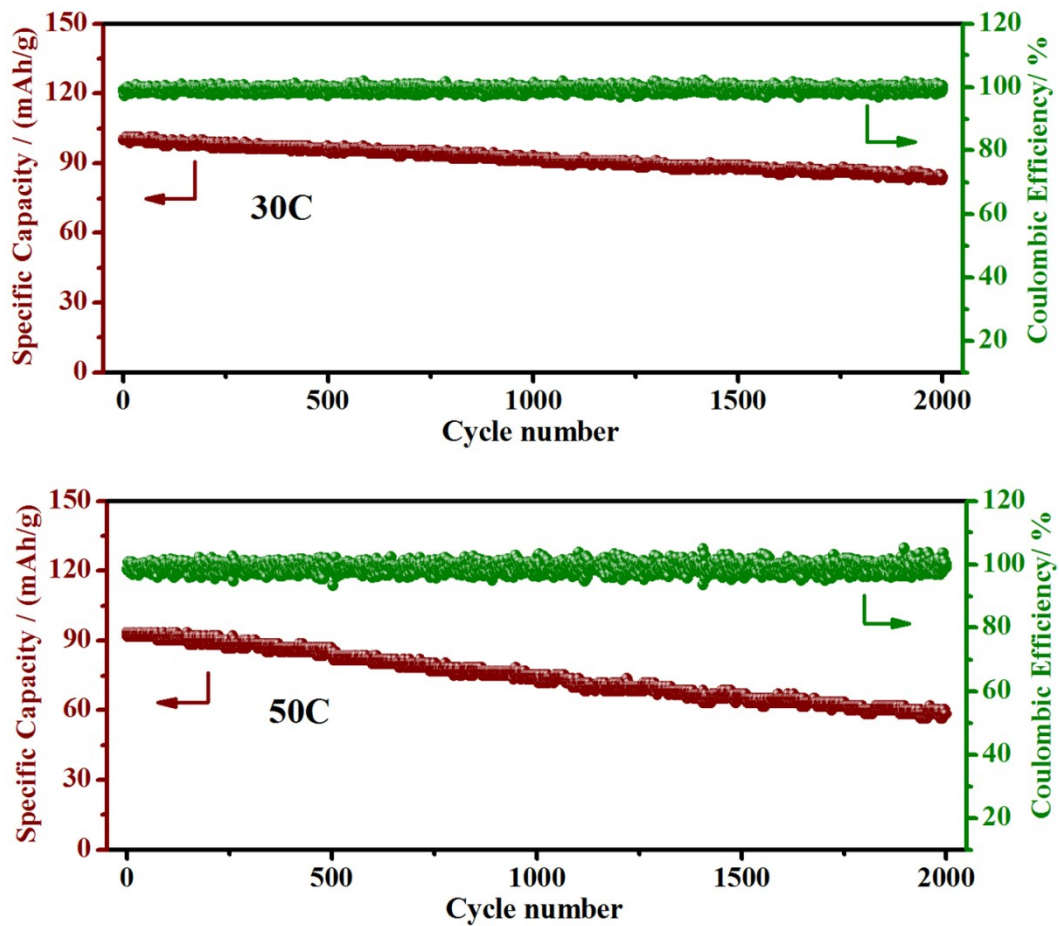

Fig. S12 Cycling performances of PL-NVP@ for over 2000 cycles

at (a) 30C and (b) 50C, respectively.

Table S2 Kinetic parameters of PL-NVP@C and NVP@C obtained from EIS equivalent circuit fitting.

| Samples  | $R_e$ ( $\Omega$ ) | $R_{ct}$ ( $\Omega$ ) | Diffusion coefficient   |
|----------|--------------------|-----------------------|-------------------------|
|          |                    |                       | $D_{Na^+}$ ( $cm^2/s$ ) |
| PL-NVP@C | 4.69               | 56.84                 | $8.33 \times 10^{-13}$  |
| NVP@C    | 3.89               | 151.2                 | $4.65 \times 10^{-14}$  |

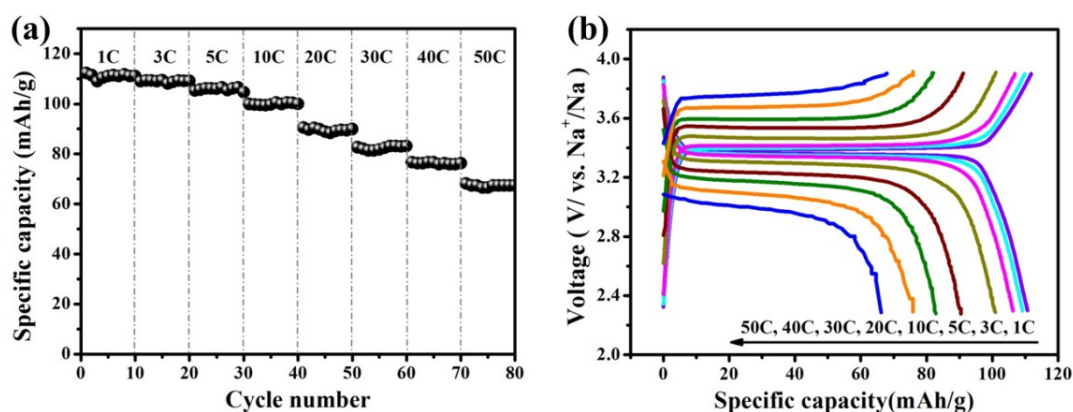

Fig. S13 (a) Rate performance and (b) charge/discharge curves of PL-NVP@C from 1 to 50C (charged and discharged under same rates).

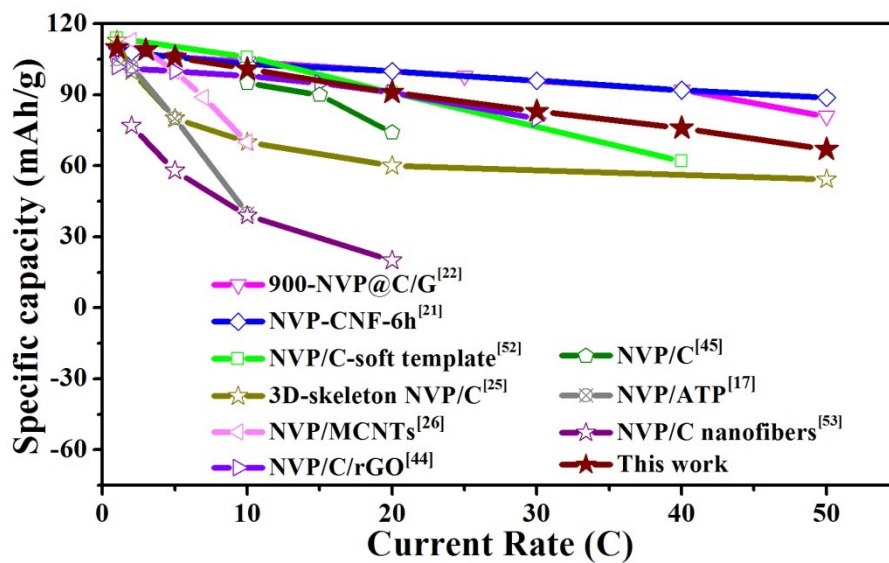

Fig.S14 Comparison of the rate capabilities of PL-NVP@C with other NVP@C materials reported before (charged and discharged under same rates).



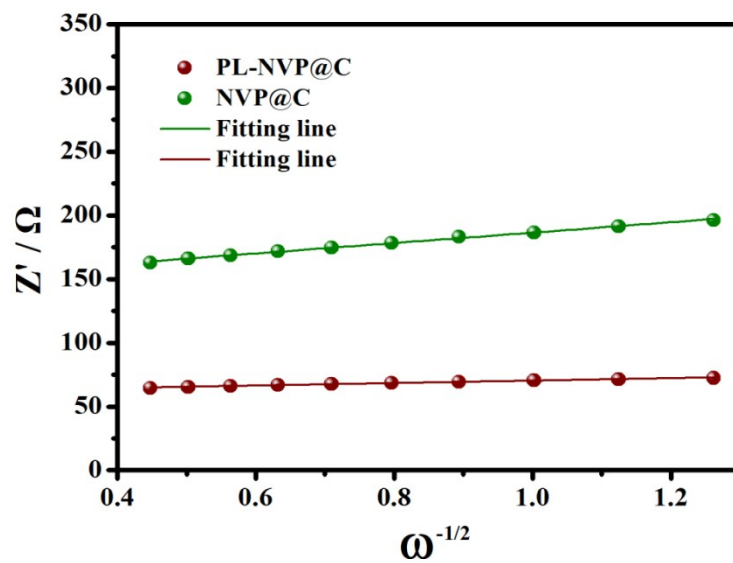

Fig. S15 The relationship between  $Z_{re}$  and  $\omega^{-1/2}$  in the low frequency region.
